# Supplementary material
Source: Springer Nature journal article supplement (https://www.springermedizin.de/resource/supplementary/12889_2013_6360_MOESM2_ESM.docx/9497720)
Supplement: MOESM2 [file 9497720]

## Table 1. Socio-demographic data (n=408).

| Variables | n | % |
| --- | --- | --- |
| Socio-economic variables |  |  |
| Age (median: 37 years) |  |  |
| <37 | 197 | 48.3 |
| ≥37 | 211 | 51.7 |
| Marital status |  |  |
| Married or living together | 243 | 59.6 |
| Divorced or separated | 48 | 11.8 |
| Widowed | 112 | 27.5 |
| Never married | 5 | 1.2 |
| Health status |  |  |
| Good | 263 | 64.5 |
| Some concerns | 115 | 28.3 |
| Feel bad | 28 | 6.9 |
| Education |  |  |
| None | 146 | 36.1 |
| Primary | 173 | 42.8 |
| Secondary or higher | 85 | 21.0 |
| Number of children (mean: 2.2) |  |  |
| Having a son | 277 | 67.9 |
| Having a daughter | 247 | 60.5 |
| Pregnancy experience after HIV diagnosis |  |  |
| Yes | 159 | 39.0 |
| No | 249 | 61.0 |
| Awareness of MTCT |  |  |
| Correct | 369 | 90.4 |
| Incorrect | 39 | 9.6 |
| Time since diagnosis of HIV positivity (median: 48 months) |  |  |
| <48 | 202 | 49.5 |
| ≥48 | 186 | 45.6 |
| Time on anti-retroviral therapy (median: 32 months) |  |  |
| <32 | 195 | 47.8 |
| ≥32 | 198 | 48.5 |
| Partner-related variables |  |  |
| Living with partner |  |  |
| Yes | 237 | 58.1 |
| No | 171 | 41.9 |
| Disclosed HIV status to partner |  |  |
| Yes | 237 | 58.2 |
| No | 170 | 41.8 |
| Partner's HIV status* |  |  |
| Positive | 192 | 74.1 |
| Negative | 58 | 22.4 |
| Unsure | 9 | 3.5 |

*Total number of women with a partner. MTCT: mother to child transmission of HIV.
